# Supplementary material for: Safety and tolerability of MRI-guided infusion of AAV2-hAADC into the mid-brain of nonhuman primate
Source: PubMed Central journal article supplement — Mol Ther Methods Clin Dev. 2014 Oct 15;3:14049–. doi: 10.1038/mtm.2014.49 (PMC4274790; doi:10.1038/mtm.2014.49), 2014-10-15
Supplement: NIHMS637086-supplement-Supplementary_Methods_and_Figures.pdf [file NIHMS637086-supplement-Supplementary_Methods_and_Figures.pdf]

## SUPPLEMENTARY MATERIAL

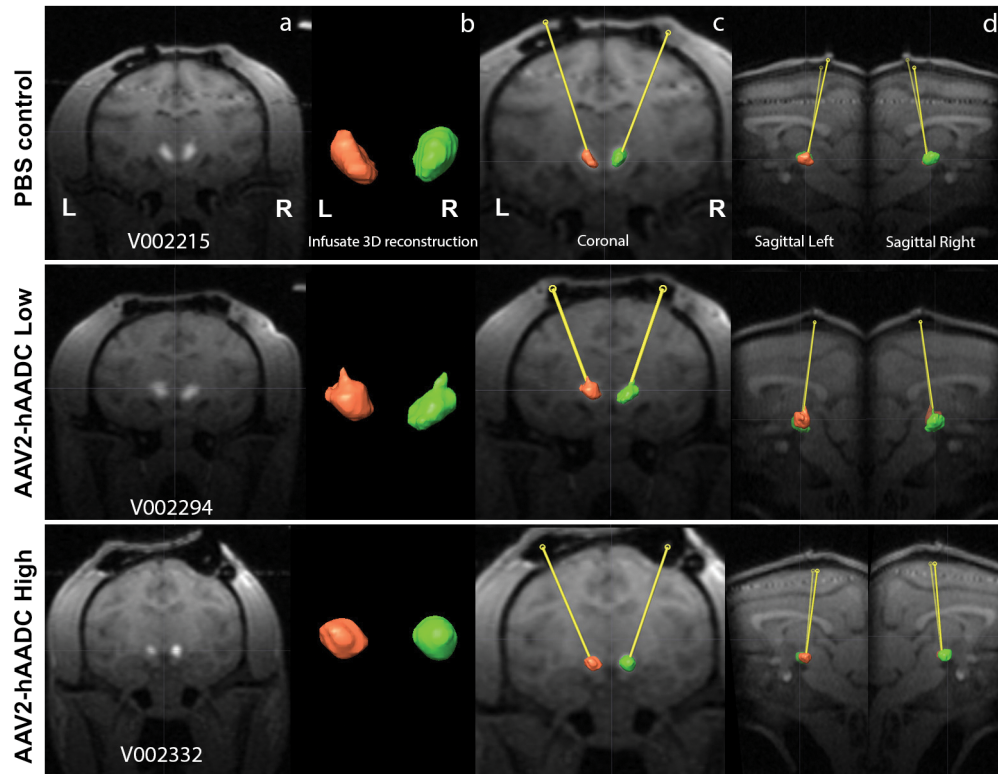

**Figure S1. Three-dimensional reconstructions of representative infusions to the substantia nigra of nonhuman primates.** Panel presents representative real-time T1-weighted magnetic resonance (MR) images (a) acquired at the conclusion of 30  $\mu$ L of AAV2-hAADC co-infused with gadolinium for an animal of each experimental group. (b) 3D reconstructions of mid-brain infusions into the right (green) and left (orange) substantia nigra were generated. Superimposition of infusion reconstructions on MR images in the coronal (c) and sagittal (d) planes show location of infusate volume in the brain.

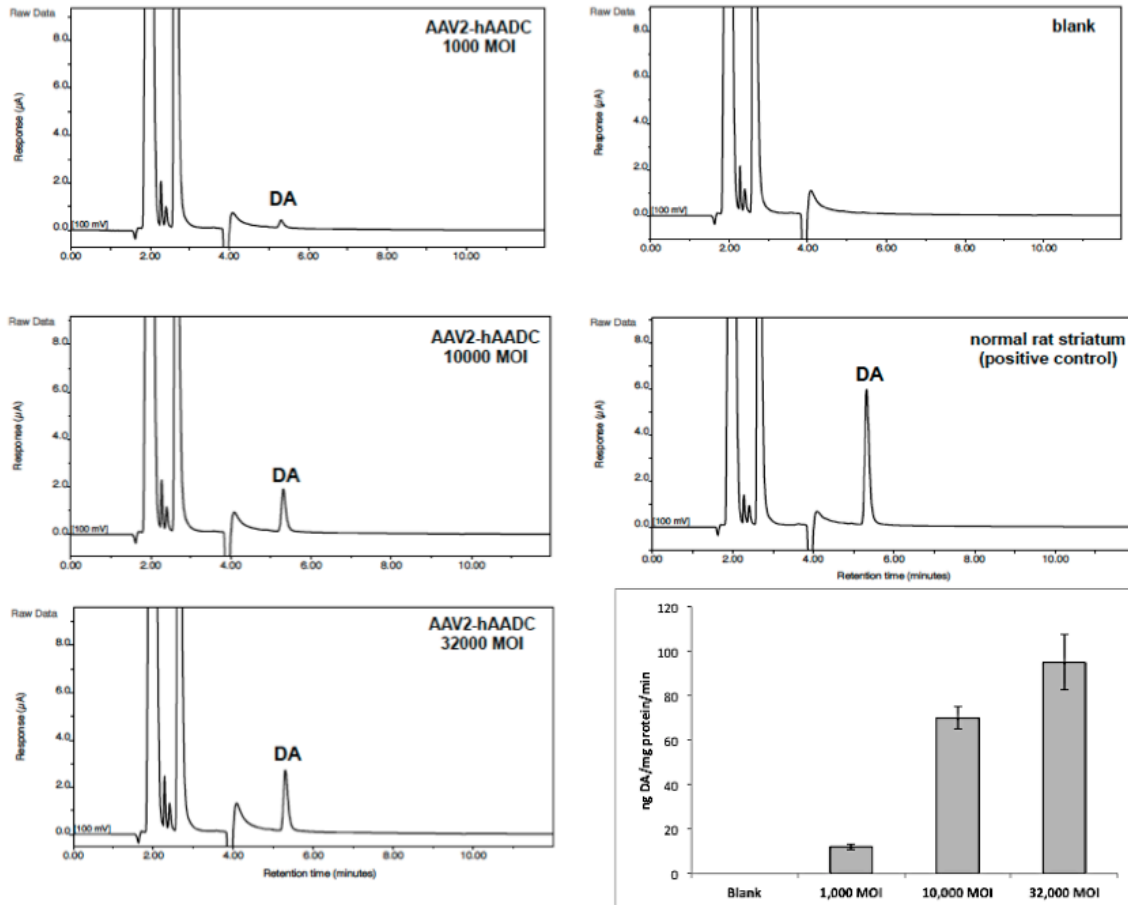

**Figure S2. AAV2-driven transgenic AADC activity.** Representative chromatograms show the rate of dopamine (DA) formation by AADC enzyme in the homogenates of cells transduced with 1000, 10000 and 32000 AAV2-hAADC multiplicity of infection (MOI), non-transduced cells (blank) and naïve rat striatum, which was used as a positive control. Histogram on the right shows the quantitative analysis of HPLC data (n=2 per group).

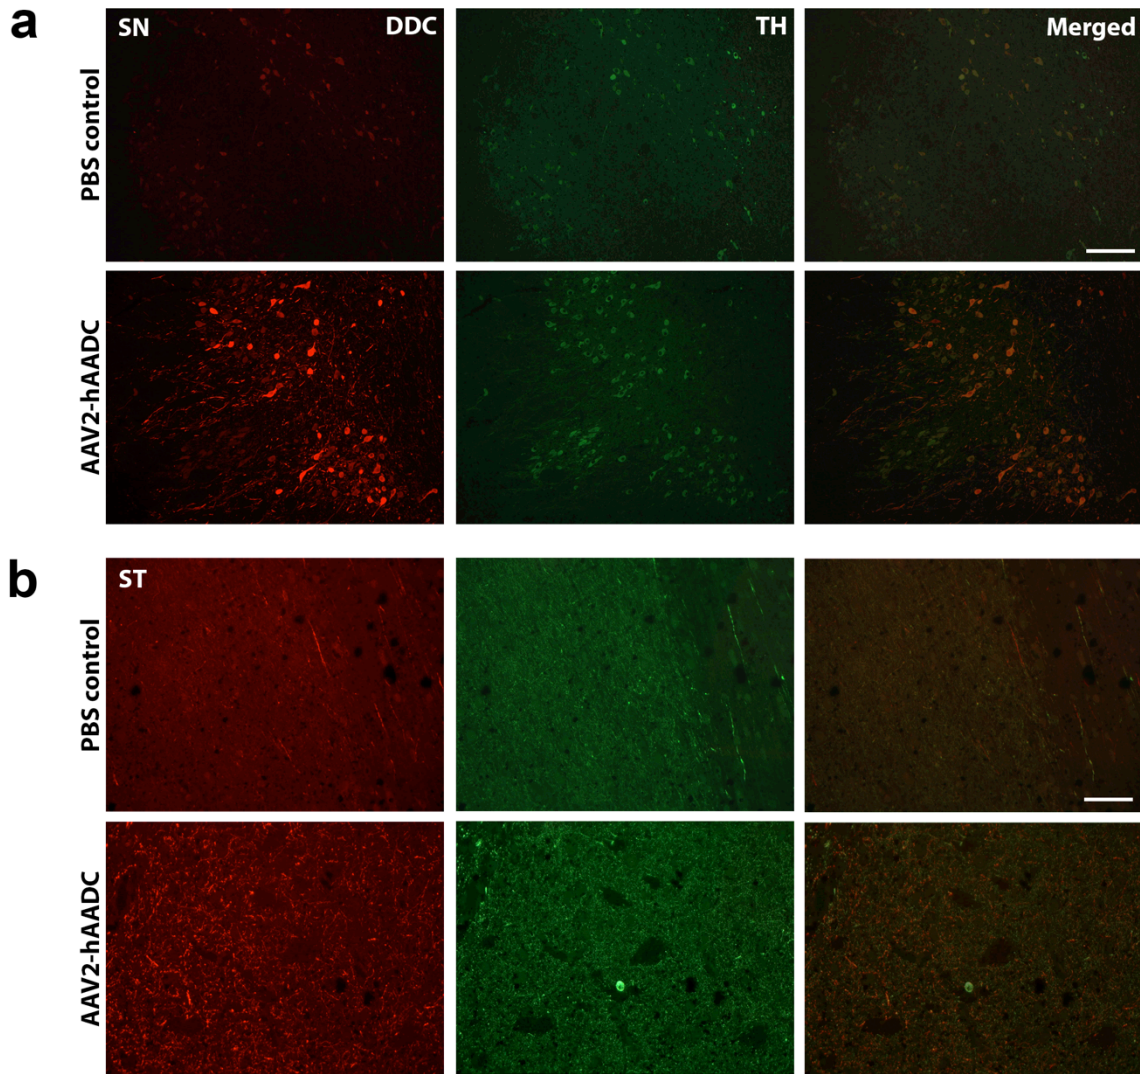

**Figure S3. AADC expression in striatum (a) and mid-brain (b) after AAV2-hAADC delivery to mid-brain.** Double immunofluorescent staining against TH and DDC in the mid-brain shows some more intensely stained nigral cell bodies in AAV2-hAADC receiving animals than in PBS-treated controls. Similarly, DDC immunofluorescence in striatum demonstrated the presence of the transgenic AADC in nigrostriatal terminals that widely covered both caudate and putamen nuclei. Images show AADC staining in transduced fibers in AAV2-hAADC-treated animals is more intense than endogenous signal in PBS control group. Scale bar: a, 200  $\mu\text{m}$ ; b, 400  $\mu\text{m}$ .

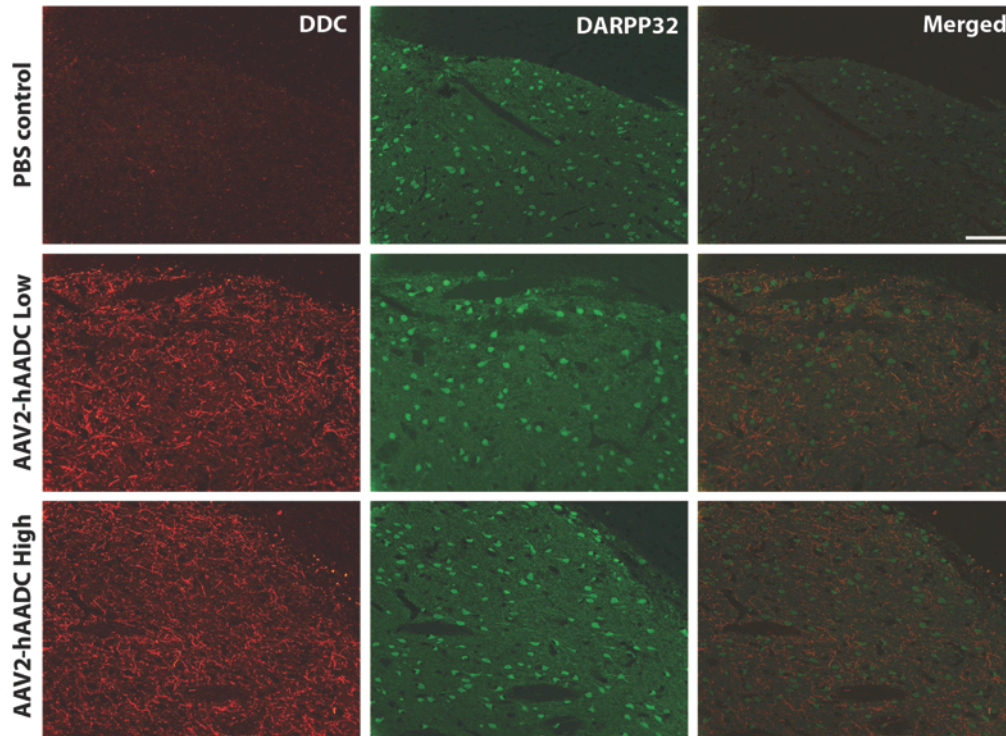

**Figure S4. Striatal medium spiny neurons do not express AADC.** Double immunofluorescent staining against DDC and DARPP32 (medium spiny neuron marker) in the striatum demonstrated the presence of the transgenic AADC in nigrostriatal terminals but not in striatal neurons. Scale bar: 200  $\mu$ m.

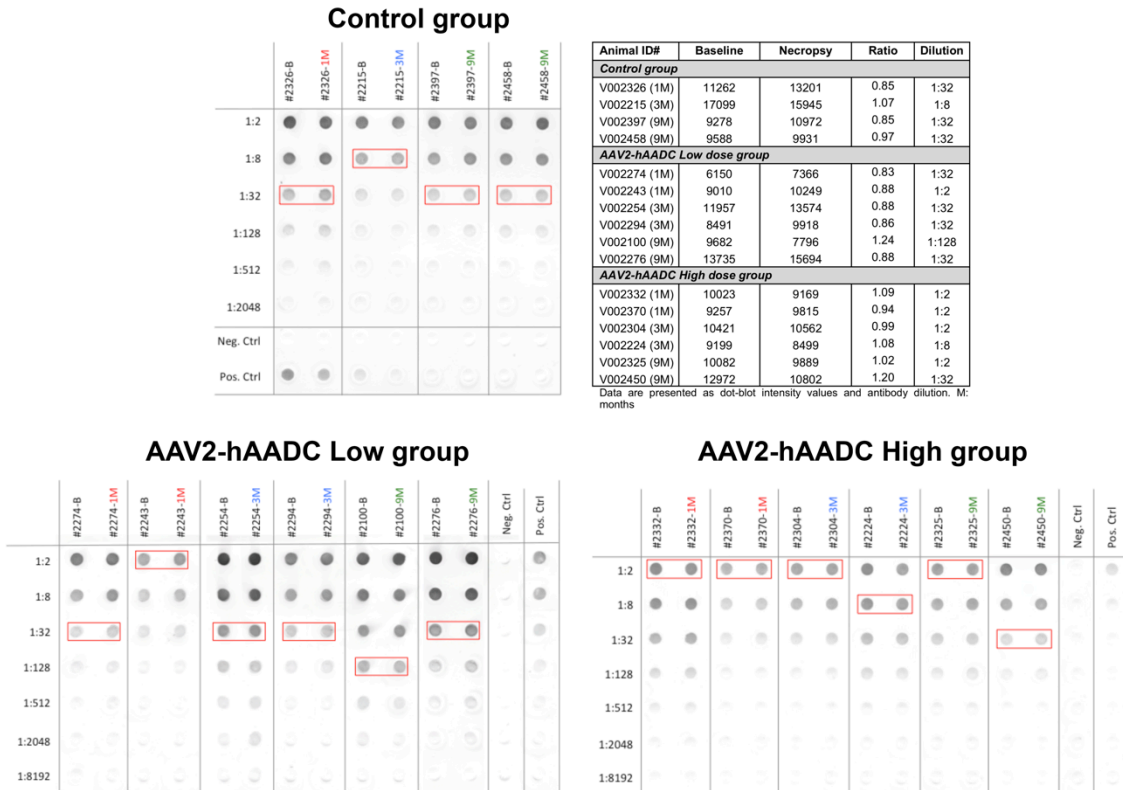

**Figure S5. Lack of antibody production against AADC protein.** Dot-blot assay showed that all animals presented anti-AADC antibodies at baseline. No significant increase of the anti-AADC antibody titer was detected in blood samples collected at necropsy for AAV2-hAADC-treated animals regardless of the dose. Data in table correspond to dot-blot intensity and antibody dilution. Red squares highlight dots comprehended in the intensity reading window ( $\leq 20,000$  to  $\geq 5,000$ ). M: months.

**Table S1.** Vd/Vi ratios

| Animal ID                         | Left        |         |                  | Right        |         |                  |
|-----------------------------------|-------------|---------|------------------|--------------|---------|------------------|
|                                   | Vd (mL)     | Vi (mL) | Vd/Vi            | Vd (mL)      | Vi (mL) | Vd/Vi            |
| <b>Pilot group</b>                |             |         |                  |              |         |                  |
| MCY32743                          | 0.0580      | 0.030   | 1.93             | 0.0700       | 0.028   | 2.50             |
| MCY34023                          | 0.0600      | 0.026   | 2.31             | 0.1000       | 0.046   | 2.17             |
| <b>Vd/Vi (Mean±SD)</b>            | <b>Left</b> |         | <b>2.1±0.3</b>   | <b>Right</b> |         | <b>2.3±0.2</b>   |
| <b>Control group</b>              |             |         |                  |              |         |                  |
| V002326                           | N/A         | 0.030   | N/A <sup>a</sup> | N/A          | 0.030   | N/A <sup>a</sup> |
| V002215                           | 0.0640      | 0.030   | 2.13             | 0.0628       | 0.030   | 2.09             |
| V002397                           | 0.0792      | 0.030   | 2.64             | 0.0744       | 0.030   | 2.48             |
| V002458                           | N/A         | 0.030   | N/A*             | N/A          | 0.030   | N/A*             |
| <b>AAV2-hAADC Low dose group</b>  |             |         |                  |              |         |                  |
| V002243                           | 0.0741      | 0.030   | 2.47             | 0.1009       | 0.030   | 3.36             |
| V002274                           | 0.0613      | 0.030   | 2.04             | 0.0475       | 0.030   | 1.58             |
| V002254                           | 0.0983      | 0.030   | N/A <sup>a</sup> | 0.1147       | 0.030   | N/A <sup>a</sup> |
| V002294                           | 0.0679      | 0.030   | 2.26             | 0.0728       | 0.030   | 2.43             |
| V002100                           | 0.0810      | 0.030   | 2.70             | 0.0780       | 0.030   | 2.60             |
| V002276                           | 0.0620      | 0.030   | 2.07             | 0.0687       | 0.030   | 2.29             |
| <b>AAV2-hAADC High dose group</b> |             |         |                  |              |         |                  |
| V002332                           | 0.0603      | 0.030   | 2.01             | 0.0585       | 0.030   | 1.95             |
| V002370                           | 0.0288      | 0.030   | 0.96             | 0.0271       | 0.030   | 0.90             |
| V002224                           | 0.0664      | 0.030   | 2.21             | 0.0761       | 0.030   | 2.54             |
| V002304                           | 0.0587      | 0.030   | 1.96             | 0.0603       | 0.030   | 2.01             |
| V002325 <sup>b</sup>              | N/A         | 0.030   | N/A              | N/A          | 0.030   | N/A              |
| V002450                           | 0.0660      | 0.030   | 2.20             | 0.0744       | 0.030   | 2.48             |
| <b>Vd/Vi (Mean±SD)</b>            | <b>Left</b> |         | <b>2.1±0.4</b>   | <b>Right</b> |         | <b>2.2±0.6</b>   |

<sup>a</sup>: excluded due to reflux or perivascular leakage; <sup>b</sup>: no post-infusion scans; N/A: not available; SD: standard deviation; Vd: volume of diffusion; Vi: volume of infusate.

**Table S2.** Transgenic AADC expression in nigrostriatal fibers

| NHP ID                     | Section ID | Striatum |        |       |        |
|----------------------------|------------|----------|--------|-------|--------|
|                            |            | Lt Cd    | Lt Put | Rt Cd | Rt Put |
| <b>Control group</b>       |            |          |        |       |        |
| V002326<br>(1M)            | F          | -        | -      | -     | -      |
|                            | G          | -        | -      | -     | -      |
|                            | H          | -        | -      | -     | -      |
|                            | I          | -        | -      | -     | -      |
| V002215<br>(1M)            | F          | -        | -      | -     | -      |
|                            | G          | -        | -      | -     | -      |
|                            | H          | -        | -      | -     | -      |
|                            | I          | -        | -      | -     | -      |
| V002397<br>(3M)            | F          | -        | -      | -     | -      |
|                            | G          | -        | -      | -     | -      |
|                            | H          | -        | -      | -     | -      |
|                            | I          | -        | -      | -     | -      |
| V002458<br>(9M)            | F          | -        | -      | -     | -      |
|                            | G          | -        | -      | -     | -      |
|                            | H          | -        | -      | -     | -      |
|                            | I          | -        | -      | -     | -      |
| <b>AAV2-hAADC Low dose</b> |            |          |        |       |        |
| V002243<br>(1M)            | F          | ++       | ++     | ++    | ++     |
|                            | G          | +++      | +++    | ++    | ++     |
|                            | H          | +++      | +++    | +++   | +++    |
|                            | I          | +++      | +++    | +++   | ++     |
| V002274<br>(1M)            | F          | +        | +      | ++    | ++     |
|                            | G          | ++       | ++     | +++   | +++    |
|                            | H          | ++       | ++     | +++   | +++    |
|                            | I          | -        | -      | ++    | +++    |
| V002254<br>(3M)            | F          | -        | N/A    | -     | N/A    |
|                            | G          | +        | +      | +     | +      |
|                            | H          | +        | +      | +     | +      |
|                            | I          | ++       | ++     | ++    | ++     |
| V002294<br>(3M)            | F          | ++       | N/A    | +     | +      |
|                            | G          | +++      | +++    | ++    | ++     |
|                            | H          | +++      | +++    | +++   | ++     |
|                            | I          | +++      | +++    | +++   | +++    |
| V002100<br>(9M)            | F          | +++      | +++    | +++   | +++    |
|                            | G          | +++      | ++     | +++   | ++     |
|                            | H          | +++      | ++     | +++   | ++     |
|                            | I          | +++      | ++     | +++   | ++     |
| V002276<br>(9M)            | F          | ++       | ++     | ++    | -/+    |
|                            | G          | +++      | ++     | ++    | ++     |
|                            | H          | +++      | +++    | +++   | ++     |
|                            | I          | +++      | ++     | +++   | ++     |

| <b>AAV2-hAADC High dose</b> |   |     |     |     |     |
|-----------------------------|---|-----|-----|-----|-----|
| V002332<br>(1M)             | F | +++ | ++  | ++  | ++  |
|                             | G | +++ | ++  | +++ | +++ |
|                             | H | +++ | ++  | +++ | +++ |
|                             | I | +++ | ++  | +++ | N/A |
| V002370<br>(1M)             | F | ++  | +   | +++ | +++ |
|                             | G | ++  | ++  | +++ | +++ |
|                             | H | ++  | ++  | +++ | +++ |
|                             | I | +++ | ++  | +++ | +++ |
| V002224<br>(3M)             | F | +   | +   | ++  | ++  |
|                             | G | +++ | ++  | +++ | +++ |
|                             | H | +++ | +++ | +++ | +++ |
|                             | I | +++ | +++ | +++ | +++ |
| V002304<br>(3M)             | F | +++ | ++  | +   | +   |
|                             | G | +++ | ++  | ++  | +   |
|                             | H | +++ | +++ | ++  | ++  |
|                             | I | +++ | ++  | +++ | ++  |
| V002325<br>(9M)             | F | -   | -   | +   | +   |
|                             | G | ++  | ++  | +   | -   |
|                             | H | ++  | ++  | ++  | +++ |
|                             | I | ++  | +   | ++  | +   |
| V002450<br>(9M)             | F | ++  | ++  | +++ | +++ |
|                             | G | +++ | +++ | +++ | +++ |
|                             | H | +++ | +++ | +++ | +++ |
|                             | I | +++ | +++ | +++ | +++ |

AADC-ir fiber staining rating: -: absent (endogenous AADC staining); +: low intensity / sparse fiber staining; ++: intermediate intensity / many positive fibers; +++: high intensity / dense fiber staining.. Abbreviations: Cd: caudate nucleus; M: months; N/A: not available; Put: putamen.



**Table S3.** Off-target of AADC expression in AAV2-hAADC Low dose group

| NHP ID          |   | Cx <sup>a</sup> | GP    | Th           | MFB | STN     | SNpr               | RN            | SC              | Others                                                      |
|-----------------|---|-----------------|-------|--------------|-----|---------|--------------------|---------------|-----------------|-------------------------------------------------------------|
| V002243<br>(1M) | L | -               | -     | -            | -   | C (++)  | -                  | -             | -               | F (+) dorsal to PPT and central tegmental field             |
|                 | R | -               | F (+) | F (++)/C (+) | -   | C (++)  | F (+) <sup>b</sup> | -             | -               | -                                                           |
| V002274<br>(1M) | L | -               | -     | -            | -   | -       | -                  | F (+)         | -               | F (+) parabrachial pigmented nucleus                        |
|                 | R | -               | -     | -            | -   | -       | F (+) <sup>b</sup> | F (+)         | -               | F (+) parabrachial pigmented nucleus                        |
| V002254<br>(3M) | L | -               | F (+) | -            | -   | F/C (+) | -                  | -             | -               | F (+) corona radiata/IC                                     |
|                 | R | -               | F (+) | F/C (+)      | -   | F/C (+) | F (+) <sup>b</sup> | -             | -               | F (+) corona radiata/IC, reticular formation (dorsal to SN) |
| V002294<br>(3M) | L | -               | -     | -            | -   | F/C (+) | -                  | C (+)         | F (+)<br>Cv,T,L | F (+) corona radiata/IC<br>C (+) central tegmental field    |
|                 | R | -               | F (+) | F (+)        | -   | F/C (+) | -                  | C (+)         | -               | C (+) central tegmental field                               |
| V002100<br>(9M) | L | -               | -     | -            | -   | -       | -                  | F (+)         | -               | Cortical fibers                                             |
|                 | R | -               | -     | -            | -   | -       | -                  | F (+)         | -               | Ocular nucleus                                              |
| V002276<br>(9M) | L | -               | -     | F (++)/C (+) | -   | F/C (+) | -                  | C (+)<br>mag. | -               | F (+) corona radiata/IC                                     |
|                 | R | -               | -     | F (++)/C (+) | -   | F/C (+) | -                  | -             | -               | -                                                           |

AADC-ir fiber staining rating: -: absent (endogenous AADC staining); +: low intensity / sparse fiber staining; ++: intermediate intensity / many positive fibers; +++: high intensity / dense fiber staining. <sup>a</sup>Cortical region surrounding cannula entry point. <sup>b</sup>Corticospinal (thick) fibers. Abbreviations: C: cells; Cv: cervical; F: fibers; GP: globi pallidi; HTh: hypothalamus; IC: internal capsule; L: lumbar; mag.: magnocellularis; MFB: medial forebrain bundle; M: months; PPT: pedunculo pontine tegmental nucleus; RN: red nucleus; SC: spinal cord; SNpc: substantia nigra pars compacta; SNpr: substantia nigra pars reticulata; STN: subthalamic nucleus; T: thoracic; Th: thalamus; VTA: ventral tegmental area.

**Table S4.** Off-target of AADC expression in AAV2-hAADC High dose group

| NHP ID          |   | Cx <sup>a</sup> | GP      | Th                          | MFB    | STN     | SNpr               | RN                      | SC               | Others                                                                                      |
|-----------------|---|-----------------|---------|-----------------------------|--------|---------|--------------------|-------------------------|------------------|---------------------------------------------------------------------------------------------|
| V002332<br>(1M) | L | -               | -       | -                           | -      | F/C (+) | C (++)             | F (+)                   | -                | F (+) central tegmental field                                                               |
|                 | R | -               | -       | -                           | -      | F/C (+) | C (++)             | F (+)                   | -                | F (+) central tegmental field                                                               |
| V002370<br>(1M) | L | -               | F (+)   | F/C (+)                     | -      | F/C (+) | F (++)             |                         | F (+)<br>Cv,T,L  | F (+) corona radiata/IC<br>F/C (+) dorsal to SN and<br>MFB                                  |
|                 | R | -               | F (+)   | F/C (+)                     | -      | F/C (+) | F (++)             | -                       | -                | F/C (+) dorsal to SN and<br>MFB                                                             |
| V002224<br>(3M) | L | -               | -       | F (++)/C (+)<br>along tract | F (+)  | -       | -                  | F (+)                   | -                | Cortical fibers<br>F (+) dorsal to SN and MFB<br>– anterior pulvinar nucleus                |
|                 | R | -               | -       | F (++)                      | -      | C (+)   | F (+)              | F (+)                   | -                | F (+) occular nucleus and<br>dorsal to SN                                                   |
| V002304<br>(3M) | L | -               | F/C (+) | F(++)/C (+)                 | -      | C (++)  | -                  | -                       | F (+)<br>Cv      | F (+) dorsal to PPT, central<br>tegmental field                                             |
|                 | R | -               | F/C (+) | F (++)/C (+)                | -      | C (++)  | F (+) <sup>a</sup> | -                       | F (+)<br>Cv      | -                                                                                           |
| V002325<br>(9M) | L | F/C(+)          | -       | C (+) along<br>tract        | C (+)  | F/C (+) | -                  | F (+)<br>parv./<br>mag. | F (++)<br>Cv,T,L | F (+) corona radiata/IC                                                                     |
|                 | R | F/C(+)          | F (+)   | C (+) along<br>tract        | C (+)  | F/C (+) | F (+) <sup>a</sup> | F (+)<br>parv./<br>mag. | F (++)<br>Cv,T,L | F (+) corona radiata/IC,<br>reticular formation (dorsal to<br>SN)                           |
| V002450<br>(9M) | L | F/C(+)          | F (+)   | F (++)                      | F (++) | F/C (+) | F (+++)            | C (+)<br>mag.           | -                | F (+) corona radiata/IC<br>F (++) comb system, brain<br>stem and central tegmental<br>field |
|                 | R | F/C(+)          | F (+)   | F (++)                      | F (++) | F/C (+) | F (+++)            | F (++)<br>C (+)         | -                | F (++) comb system, brain<br>stem and central tegmental<br>field                            |

AADC-ir fiber staining rating: -: absent (endogenous AADC staining); +: low intensity / sparse fiber staining; ++: intermediate intensity / many positive fibers; +++: high intensity / dense fiber staining. <sup>a</sup>Cortical region surrounding cannula entry point. <sup>b</sup>Corticospinal (thick) fibers. Abbreviations: C: cells; Cv: cervical; F: fibers; GP: globi pallidi; IC: internal capsule; L: lumbar; mag.: magnocellularis; MFB: medial forebrain bundle; M: months; parv.: parvocellularis; PPT: pedunculopontine tegmental nucleus; RN: red nucleus; SC: spinal cord; SNpr: substantia nigra pars reticulata; STN: subthalamic nucleus; T: thoracic; Th: thalamus.

**Table S5.** Monoamine levels in the CSF

| Animal ID                         | Dopamine |      | DOPAC |      | HVA  |      | Serotonin |      | 5-HIAA |      |
|-----------------------------------|----------|------|-------|------|------|------|-----------|------|--------|------|
|                                   | Bsln     | Ncrp | Bsln  | Ncrp | Bsln | Ncrp | Bsln      | Ncrp | Bsln   | Ncrp |
| <b>Pilot group</b>                |          |      |       |      |      |      |           |      |        |      |
| MCY32743                          | BLQ      | BLQ  | 10    | BLQ  | 340  | 220  | ND        | ND   | 139    | 102  |
| MCY34023                          | BLQ      | BLQ  | BLQ   | BLQ  | 273  | 206  | ND        | ND   | 104    | 85   |
| <b>Control group</b>              |          |      |       |      |      |      |           |      |        |      |
| V002326(1M) <sup>a</sup>          | ND       | BLQ  | ND    | BLQ  | ND   | 149  | ND        | BLQ  | ND     | 43   |
| V002215(3M)                       | BLQ      | BLQ  | BLQ   | BLQ  | 163  | 182  | BLQ       | BLQ  | 41     | 48   |
| V002397(9M)                       | BLQ      | BLQ  | BLQ   | BLQ  | 259  | 179  | BLQ       | BLQ  | 62     | 33   |
| V002458(9M)                       | BLQ      | BLQ  | BLQ   | BLQ  | 232  | 163  | BLQ       | BLQ  | 62     | 59   |
| <b>AAV2-hAADC Low dose group</b>  |          |      |       |      |      |      |           |      |        |      |
| V002243(1M)                       | BLQ      | BLQ  | BLQ   | BLQ  | 178  | 133  | BLQ       | BLQ  | 67     | 64   |
| V002274(1M)                       | BLQ      | 11   | BLQ   | BLQ  | 191  | 159  | BLQ       | BLQ  | 61     | 56   |
| V002254(3M)                       | BLQ      | 27   | BLQ   | 18   | 169  | 142  | BLQ       | 17   | 65     | 58   |
| V002294(3M)                       | BLQ      | BLQ  | BLQ   | BLQ  | 203  | 210  | BLQ       | BLQ  | 56     | 63   |
| V002100(9M)                       | BLQ      | BLQ  | BLQ   | BLQ  | 202  | 124  | BLQ       | BLQ  | 51     | 39   |
| V002276(9M) <sup>a</sup>          | BLQ      | ND   | BLQ   | ND   | 235  | ND   | BLQ       | ND   | 51     | ND   |
| <b>AAV2-hAADC High dose group</b> |          |      |       |      |      |      |           |      |        |      |
| V002332(1M)                       | BLQ      | BLQ  | BLQ   | BLQ  | 204  | 149  | BLQ       | BLQ  | 62     | 56   |
| V002370(1M)                       | BLQ      | BLQ  | BLQ   | BLQ  | 130  | 107  | BLQ       | BLQ  | 46     | 42   |
| V002224(3M)                       | BLQ      | BLQ  | BLQ   | BLQ  | 177  | 180  | BLQ       | BLQ  | 29     | 46   |
| V002304(3M)                       | BLQ      | BLQ  | BLQ   | BLQ  | 308  | 275  | BLQ       | BLQ  | 75     | 75   |
| V002325(9M)                       | BLQ      | BLQ  | BLQ   | BLQ  | 185  | 171  | BLQ       | BLQ  | 32     | 66   |
| V002450(9M)                       | BLQ      | BLQ  | BLQ   | BLQ  | 155  | 169  | BLQ       | BLQ  | 62     | 92   |

All data presented as ng/mL. <sup>a</sup>CSF sample was contaminated with blood and not analyzed. BLQ: below limit of quantification; Bsln: baseline; Ncrp: necropsy, ND: not determined.

**Table S6.** Serum and CSF vector DNA levels

| <b>Animal ID #</b>                       | <b>Blood serum<br/>4 h</b> | <b>Blood serum<br/>necropsy</b> | <b>CSF<br/>necropsy</b> |
|------------------------------------------|----------------------------|---------------------------------|-------------------------|
| <b><i>Control group</i></b>              |                            |                                 |                         |
| V002326 - 1M                             | < 10                       | < 10                            | < 10                    |
| V002215 - 3M                             | < 10                       | < 10                            | < 10                    |
| V002397 - 9M                             | < 10                       | < 10                            | < 10                    |
| V002458 - 9M                             | < 10                       | < 10                            | < 10                    |
| <b><i>AAV2-hAADC Low dose group</i></b>  |                            |                                 |                         |
| V002243 - 1M                             | < 10                       | < 10                            | < 10                    |
| V002274 - 1M                             | < 10                       | < 10                            | < 10                    |
| V002254 - 3M                             | < 10                       | < 10                            | < 10                    |
| V002294 - 3M                             | < 10                       | < 10                            | < 10                    |
| V002100 - 9M                             | < 10                       | < 10                            | < 10                    |
| V002276 - 9M                             | < 10                       | < 10                            | < 10                    |
| <b><i>AAV2-hAADC High dose group</i></b> |                            |                                 |                         |
| V002332 - 1M                             | 1,917 ± 43                 | < 10                            | < 10                    |
| V002370 - 1M                             | < 10                       | < 10                            | < 10                    |
| V002224 - 3M                             | 76 ± 25                    | < 10                            | < 10                    |
| V002304 - 3M                             | 462 ± 70                   | 64 ± 9                          | < 10                    |
| V002325 - 9M                             | 4,794 ± 49                 | < 10                            | < 10                    |
| V002450 - 9M                             | < 10                       | 59 ± 24                         | < 10                    |

All data reported in DNA copies/mL; M: months

**Table S7.** Serum and CSF AADC protein levels

| <b>Animal ID #</b>                       | <b>Blood serum baseline</b> | <b>Blood serum necropsy</b> | <b>CSF necropsy</b> |
|------------------------------------------|-----------------------------|-----------------------------|---------------------|
| <b><i>Control group</i></b>              |                             |                             |                     |
| V002326 - 1M                             | 204                         | 191                         | BDL                 |
| V002215 - 3M                             | BDL                         | BDL                         | BDL                 |
| V002397 - 9M                             | BDL                         | BDL                         | BDL                 |
| V002458 - 9M                             | 575                         | 311                         | 278                 |
| <b><i>AAV2-hAADC Low dose group</i></b>  |                             |                             |                     |
| V002243 - 1M                             | BDL                         | BDL                         | BDL                 |
| V002274 - 1M                             | BDL                         | BDL                         | BDL                 |
| V002254 - 3M                             | 2,773                       | 3,298                       | BDL                 |
| V002294 - 3M                             | BDL                         | 210                         | 278                 |
| V002100 - 9M                             | 272                         | 309                         | 141                 |
| V002276 - 9M                             | 808                         | 1,997                       | BDL                 |
| <b><i>AAV2-hAADC High dose group</i></b> |                             |                             |                     |
| V002332 - 1M                             | BDL                         | BDL                         | BDL                 |
| V002370 - 1M                             | BDL                         | BDL                         | BDL                 |
| V002224 - 3M                             | BDL                         | BDL                         | BDL                 |
| V002304 - 3M                             | BDL                         | BDL                         | BDL                 |
| V002325 - 9M                             | 2,584                       | 17,863                      | 512                 |
| V002450 - 9M                             | 153                         | 367                         | BDL                 |

All data reported in pg/mL; BDL: below detection limit of 62.5 pg/mL; M: months

**Table S8.** Anti-AAV2 neutralizing antibody titers

| <b>Animal ID #</b>                       | <b>Baseline</b> | <b>Necropsy</b> |
|------------------------------------------|-----------------|-----------------|
| <b><i>Control group</i></b>              |                 |                 |
| V002326 - 1M                             | <1:25           | <1:25           |
| V002215 - 3M                             | 1:25            | 1:25            |
| V002397 - 9M                             | 1:50            | not tested*     |
| V002458 - 9M                             | <1:25           | <1:25           |
| <b><i>AAV2-hAADC Low dose group</i></b>  |                 |                 |
| V002243 - 1M                             | <1:25           | <1:25           |
| V002274 - 1M                             | <1:25           | <1:25           |
| V002254 - 3M                             | <1:25           | <1:25           |
| V002294 - 3M                             | <1:25           | <1:25           |
| V002100 - 9M                             | <1:25           | <1:25           |
| V002276 - 9M                             | <1:25           | <1:25           |
| <b><i>AAV2-hAADC High dose group</i></b> |                 |                 |
| V002332 - 1M                             | <1:25           | 1:50            |
| V002370 - 1M                             | <1:25           | 1:100           |
| V002224 - 3M                             | 1:25            | 1:1600          |
| V002304 - 3M                             | <1:25           | 1:200           |
| V002325 - 9M                             | <1:25           | 1:800           |
| V002450 - 9M                             | <1:25           | 1:800           |

M: months, \*sample contaminated

## Supplementary Materials and Methods

### *In vitro* AADC activity assay

AADC activity from AAV2-hAADC vector was determined by a cell-based *in vitro* assay adapted from a previously published method<sup>1,2</sup>. Briefly, transfected and non-transfected cells (blank) were rinsed in ice-cold PBS and lysed in 100  $\mu$ L of 0.25M sucrose solution by mechanical disruption using glass beads (0.1 mm) in a Bullet Blender (Next Advance). Positive control striatum tissue was homogenized in 10 volumes of 0.25M sucrose solution and lysed by mechanical disruption as well. After centrifugation for 20 min at 10,000 x g and 4°C, the supernatant was collected and kept on ice. To measure enzymatic conversion of L-DOPA into dopamine, 40  $\mu$ L of the supernatant was added to 360  $\mu$ L of an incubation mixture containing 50mM sodium phosphate buffer, pH 7.2; 0.1mM ascorbic acid, 0.1mM pyridoxal-5'-phosphate, 1mM DL-dithiothreitol, 0.1mM EDTA, and 0.1mM pargyline. Samples were pre-incubated at 37°C for 5 min and the reaction was initiated by addition of 20  $\mu$ L of L-DOPA (Sigma, St. Louis, MO; 0.3mM final concentration) and allowed to proceed for 30 min at 37°C, whereupon it was stopped by addition of 80  $\mu$ L ice-cold 0.4M perchloric acid. The mixture was then centrifuged at 3000 x g for 10 min. The supernatant was stored at -80°C until further HPLC analysis. Non-enzymatic conversion was determined by substituting water for the L-DOPA substrate. Some homogenates were spiked with L-DOPA solution and benserazide (0.01mM) to serve as a control.

### HPLC analysis

Dopamine was determined by HPLC coupled to an electrochemical detector (ECD). Supernatant (30  $\mu$ L) was injected onto the HPLC-ECD system (CoulArray 5600A; ESA, Chelmsford, MA) and was separated on a reverse-phase, analytical column MD-150X3.2 (ESA, Chelmsford, MA) with a mobile MD-TM phase flow rate of 0.5 mL/min. Samples were quantified by comparison with a DA standard solution (Sigma-Aldrich, St. Louis, MO) of known concentration. HPLC-ECD software was used to quantify the area under the peaks. The DC protein assay kit (Bio-Rad) was used to determine the protein concentration in the primary supernatant (homogenate in 0.25M sucrose). AADC activity was expressed as ng DA/min/mg protein.

1. Nagatsu, T, Yamamoto, T, Kato, T (1979). A new and highly sensitive voltammetric assay for aromatic L-amino acid decarboxylase activity by high-performance liquid chromatography. *Anal Biochem* 100:160-165.
2. Jonkers, N, Sarre, S, Ebinger, G, Michotte, Y (2001). Benserazide decreases central AADC activity, extracellular dopamine levels and levodopa decarboxylation in striatum of the rat. *J Neural Transm* 108:559-570.
